# Supplementary material
Source: PubMed Central journal article supplement (PMC2668001)
Supplement: mmc1.pdf [file mmc1.pdf]

## Supplemental Data

### A Missense Mutation in *CASK*

### Causes FG Syndrome in an Italian Family

Giulio Piluso, Francesca D'Amico, Valentina Saccone, Ettore Bismuto, Ida Luisa Rotundo, Marina Di Domenico, Stefania Aurino, Charles E. Schwartz, Giovanni Neri, and Vincenzo Nigro

**Table S1** - *Primer pairs designed for CASK mutation screening*

| <i>Exon</i> |   | <i>Primer</i>                | <i>Amplicon (bp)</i> | <i>Annealing temperature (°C)</i> | <i>Start gradient solution B (%)</i> | <i>Column temperature (°C)</i> |
|-------------|---|------------------------------|----------------------|-----------------------------------|--------------------------------------|--------------------------------|
| 1           | F | gctggcactgagctcttgg          | 199                  | 60                                | 48                                   | 65                             |
|             | R | aagaccggggcatcactgaaat       |                      |                                   |                                      |                                |
| 2           | F | gggaaataggaacttaagagaatcaa   | 217                  | 60                                | 50                                   | 56.5                           |
|             | R | atggaataaagccagacatcaaat     |                      |                                   |                                      |                                |
| 3           | F | tgttctacctaataagatgctgt      | 197                  | 60                                | 50                                   | 56.5                           |
|             | R | accaacattgctcaagtttacc       |                      |                                   |                                      |                                |
| 4           | F | cttcctggaatttctcttttct       | 168                  | 60                                | 48                                   | 57                             |
|             | R | ttcaactgacctctggtgatta       |                      |                                   |                                      |                                |
| 5           | F | ttataaactaggagcactgtatatt    | 200                  | 60                                | 52                                   | 53                             |
|             | R | tcagtatttctcacaaacatta       |                      |                                   |                                      |                                |
| 6           | F | atgaatccttatctcgggttgt       | 210                  | 60                                | 51                                   | 58                             |
|             | R | gcaagtgaccagggttgaaga        |                      |                                   |                                      |                                |
| 7           | F | aacattttcctaattgtgtt         | 257                  | 60                                | 50                                   | 58.5                           |
|             | R | caggataaataatcctcaatgg       |                      |                                   |                                      |                                |
| 8           | F | aatgtaatgtctcatttaaggaactatg | 225                  | 60                                | 51                                   | 60                             |
|             | R | gaaagtgtcagacaaagtgtagaagg   |                      |                                   |                                      |                                |
| 9           | F | gttttagattaagcttctgcac       | 236                  | 60                                | 51                                   | 56                             |
|             | R | tacatattatgggcaccaa          |                      |                                   |                                      |                                |
| 10          | F | agccatcatctcctatataattgact   | 259                  | 60                                | 53                                   | 53                             |
|             | R | atgaccacacagggtgaataagt      |                      |                                   |                                      |                                |
| 11          | F | ggcttgataacctgctgttcta       | 161                  | 60                                | 51                                   | 58                             |
|             | R | aacaactacacaaaacagccaag      |                      |                                   |                                      |                                |
| 12          | F | tgacattgactttctatactggctgtt  | 223                  | 60                                | 50                                   | 58.5                           |
|             | R | ggccaataatcaattcaccacaaaa    |                      |                                   |                                      |                                |
| 13          | F | caaagaattgtgagtgfttactgga    | 179                  | 60                                | 50                                   | 56                             |
|             | R | caataaaaggtggcaaatatgatga    |                      |                                   |                                      |                                |
| 14          | F | ttgtaaatctgtgtcatgtttgta     | 176                  | 60                                | 51                                   | 53                             |
|             | R | gaaagtgaggttcagttctatgg      |                      |                                   |                                      |                                |
| 15          | F | tacacagaaggctgcaaaggaa       | 470                  | 60                                | 55                                   | 58.5                           |
|             | R | cccaactcctagtagcataggtt      |                      |                                   |                                      |                                |
| 16          | F | ttatctaccgcaaaatcacaaata     | 202                  | 60                                | 52                                   | 54                             |
|             | R | taaggaaaggcaaaagaaat         |                      |                                   |                                      |                                |
| 17          | F | tgatgcctctggattttgtacta      | 382                  | 60                                | 55                                   | 55                             |
|             | R | gttaaagcccactgctaagac        |                      |                                   |                                      |                                |
| 18          | F | aaacttttcttcttccaccac        | 171                  | 60                                | 49                                   | 60                             |
|             | R | tacagccatcagcagcagttagt      |                      |                                   |                                      |                                |
| 19          | F | ctggttctctgttaatgaacct       | 157                  | 60                                | 50                                   | 58                             |
|             | R | agcaccaacaaaattgcacac        |                      |                                   |                                      |                                |
| 20          | F | cttctcagcttctgctaataat       | 293                  | 60                                | 55                                   | 55                             |
|             | R | gattggctattagctgctcagtt      |                      |                                   |                                      |                                |
| 21          | F | tctcttcacatcactatggcatc      | 320                  | 60                                | 56                                   | 56.5                           |

**American Journal of Human Genetics, Volume 84**

|            |   |                            |     |    |           |           |
|------------|---|----------------------------|-----|----|-----------|-----------|
|            | R | ataaaattggaaaatggatgtca    |     |    |           |           |
| 22         | F | tgatgactctctattttatcaacc   | 227 | 60 | 51        | 59        |
|            | R | cttaaccagcctcagtaacagt     |     |    |           |           |
| 23         | F | aagccatatacataagttggattc   | 270 | 60 | 52        | 54.5      |
|            | R | aatgtttgaaagtgagaataagca   |     |    |           |           |
| 24         | F | ttgcttattctcactttcaaacatt  | 314 | 60 | 53        | 54.5      |
|            | R | aaactatttctcctctgttcttt    |     |    |           |           |
| 25         | F | actgggttgagtaaatctgttgg    | 353 | 60 | 57 and 50 | 58 and 62 |
|            | R | gatttcagaatctgtgcttattgg   |     |    |           |           |
| 26         | F | tttctcttttaagtcgggatttt    | 174 | 60 | 50        | 56        |
|            | R | gcttgatccttacagcttatttgg   |     |    |           |           |
| 27         | F | acgaatccaactgatttctcttt    | 321 | 60 | 55        | 59        |
|            | R | taacaagaggcttttccacaaat    |     |    |           |           |
| Promoter A | F | ctccctgcgattacaaaagaaggaaa | 541 | 65 | N/A       | N/A       |
|            | R | CAGAGACGCTCCCTCCTCTTTCT    |     |    |           |           |
| Promoter B | F | GAGTGGGCGGAGCCTGTGGTTCT    | 594 | 65 | N/A       | N/A       |
|            | R | AGAGACTGCGGCGCCTTCCTCTG    |     |    |           |           |
| Promoter C | F | CGATCCTCGCTCCATGGTCCTG     | 574 | 65 | N/A       | N/A       |
|            | R | gaagaccgggcatcactgaaatg    |     |    |           |           |

N/A = not analyzed by DHPLC.

**Table S2** - *Mixes of pooled DNAs for CMS analysis*

| #  | <i>pooled DNAs</i>          | <i>Notes</i>                                                | <i>Heteroduplex</i> |
|----|-----------------------------|-------------------------------------------------------------|---------------------|
| 1  | CM                          | Healthy control male                                        |                     |
| 2  | II.8                        | Carrier female from pedigree                                | *                   |
| 3  | III.26 + CM                 | Affected male (proband) from pedigree + control male        | *                   |
| 4  | II.11 + CM                  | Affected male (maternal uncle) from pedigree + control male | *                   |
| 5  | II.17 + CM                  | Affected male (maternal uncle) from pedigree + control male | *                   |
| 6  | II.6 + II.9 + II.13 + II.18 | Four unaffected males from pedigree                         |                     |
| 7  | II.4 + III.22               | Two unaffected females from pedigree                        |                     |
| 8  | CF1 + CF2                   | Two unrelated healthy control females                       |                     |
| 9  | CF3 + CF4                   | Two unrelated healthy control females                       |                     |
| 10 | CF5 + CF6                   | Two unrelated healthy control females                       |                     |
| 11 | CF7 + CF8                   | Two unrelated healthy control females                       |                     |
| 12 | CF9 + CF10                  | Two unrelated healthy control females                       |                     |

For members of the FGS family under study, DNA samples are numbered according to their position in the pedigree. An asterisk (\*) indicates where the heteroduplex is expected for mutations co-segregating with the phenotype.

**Table S3** - *Primer pairs designed for RT-PCR and real-time RT-PCR*

| <i>Forward</i> |                                   | <i>Reverse</i> |                                  | <i>Amplicon (bp)</i> | <i>Annealing temperature (°C)</i> |
|----------------|-----------------------------------|----------------|----------------------------------|----------------------|-----------------------------------|
| CASK16/F       | GTGCTGTT <b>CGAGGATGTGT</b> ACGAG | CASK268/R      | CCATGTAAAGCATTCCATCTGAGCTA       | 253 (140)*           | 63                                |
| CASK16/F       | GTGCTGTT <b>CGAGGATGTGT</b> ACGAG | CASK744/R      | ACTTTCAGAGATATGGCTCCACTGC        | 729 (616)*           | 63                                |
| CASKsp1-2/F    | GTGATCGGAA <b>AGGGTCCCTTC</b>     | CASK268/R      | CCATGTAAAGCATTCCATCTGAGCTA       | 220                  | 65                                |
| CASKsp1-3/F    | CGAGGTGATCGGAA <b>ATCTAAAGC</b>   | CASK398/R      | TGGCAGTAGCGTAGAGCTTCCA           | 240                  | 65                                |
| CASK2310/F     | CAGACCTCAAAGAA <b>GACGAAGAA</b>   | CASK2545/R     | CAAAAGGAGCAA <b>ACTTGCAGTTCT</b> | 236                  | 65                                |
| GAPDH/F        | GCCTGCTT <b>CACCACCTTCTT</b>      | GAPDH/R        | CGTAGGACGTGGTGGTTGAC             | 346                  | 65                                |

An asterisk (\*) indicates the expected length for *CASK* exon 2-skipped products. Nucleotides at exon-exon junctions are typed in bold.

Table S4 - Comparison of H-bonds network at the ligand-binding site

| <i>CASK wild type</i>  |                   | <i>CASK p.R28L</i>     |                   |
|------------------------|-------------------|------------------------|-------------------|
| Donor                  | Acceptor          | Donor                  | Acceptor          |
| <b>K37 (NZ-HZ3)</b>    | <b>E58 (OE1)</b>  | <b>K37 (NZ-HZ3)</b>    | <b>E58 (OE1)</b>  |
| <b>K37 (NZ-HZ3)</b>    | <b>E58 (OE2)</b>  | <b>K37 (NZ-HZ3)</b>    | <b>E58 (OE2)</b>  |
| <b>H 135 (NE2-HE2)</b> | <b>G157 (O)</b>   | <b>H 135 (NE2-HE2)</b> | <b>G157 (O)</b>   |
| <i>H 135 (NE2-HE2)</i> | <i>D137 (O)</i>   |                        |                   |
| <b>R136 (NH2-HH22)</b> | <b>V161 (O)</b>   | <b>R136 (NH2-HH22)</b> | <b>V161 (O)</b>   |
| <b>R136 (NH1-HH12)</b> | <b>V161 (O)</b>   | <b>R136 (NH1-HH12)</b> | <b>V161 (O)</b>   |
| R136 (NE-H)            | V161 (O)          | R136 (NE-HE)           | V161 (O)          |
| <b>R136 (NH2-HH22)</b> | <b>Y192 (OH)</b>  | <b>R136 (NH2-HH22)</b> | <b>Y192 (OH)</b>  |
|                        |                   | R136 (NE-HE)           | Y192 (OH)         |
| <b>D137 (N-H)</b>      | <b>H135 (ND1)</b> | <b>D137 (N-H)</b>      | <b>H135 (ND1)</b> |
| <b>D137 (N-H)</b>      | <b>H135 (O)</b>   | <b>D137 (N-H)</b>      | <b>H135 (O)</b>   |
| <b>K139 (NZ-HZ3)</b>   | <b>D137 (OD1)</b> | <b>K139 (NZ-HZ3)</b>   | <b>D137 (OD1)</b> |
| <b>K139 (NZ-HZ3)</b>   | <b>D137 (OD2)</b> | <b>K139 (NZ-HZ3)</b>   | <b>D137 (OD2)</b> |
| <b>K139 (HZ1-HZ2)</b>  | <b>D137 (O)</b>   | <b>K139 (NZ-HZ3)</b>   | <b>D137 (O)</b>   |
|                        |                   | K139 (N-H)             | D137 (O)          |
| <b>T178 (OG1-HG1)</b>  | <b>D137 (OD1)</b> | <b>T178 (OG1-HG1)</b>  | <b>D137 (OD1)</b> |
| <b>T178 (OG1-HG1)</b>  | <b>D137 (OD2)</b> | <b>T178 (OG1-HG1)</b>  | <b>D137 (OD2)</b> |
| <b>T178 (N-H)</b>      | <b>D137 (OD1)</b> | <b>T178 (N-H)</b>      | <b>D137 (OD1)</b> |
| <b>T178 (N-H)</b>      | <b>D137 (OD2)</b> | <b>T178 (N-H)</b>      | <b>D137 (OD2)</b> |
| <b>AMP (O3'-HAA)</b>   | <b>I14 (O)</b>    | <b>AMP (O3'-HAA)</b>   | <b>I14 (O)</b>    |
| <b>AMP (N6-HA)</b>     | <b>M90 (N)</b>    | <b>AMP (N6-HAC)</b>    | <b>M90 (N)</b>    |
| <i>AMP (O2'-HAB)</i>   | <i>A93 (O)</i>    |                        |                   |
| <b>AMP (O2'-HAB)</b>   | <b>H141 (O)</b>   | <b>AMP (O2'-HAB)</b>   | <b>H141 (O)</b>   |
| <b>AMP (O3'-HAA)</b>   | <b>H141 (ND1)</b> | <b>AMP (O3'-HAA)</b>   | <b>H141 (O)</b>   |
| <i>AMP (O3'-HAA)</i>   | <i>H141 (O)</i>   |                        |                   |
| <i>S20 (OG-HG)</i>     | <i>AMP (O2P)</i>  |                        |                   |
| <i>S20 (OG-HG)</i>     | <i>AMP (O3P)</i>  |                        |                   |
| <b>K37 (NZ-HZ3)</b>    | <b>AMP (O5')</b>  | <b>K37 (NZ-HZ3)</b>    | <b>AMP (O2P)</b>  |
| <b>K37 (NZ-HZ3)</b>    | <b>AMP (O2P)</b>  | <b>K37 (NZ-HZ3)</b>    | <b>AMP (O3P)</b>  |
| <b>M90 (N-H)</b>       | <b>AMP (N1)</b>   | <b>M90 (N-H)</b>       | <b>AMP (N1)</b>   |
|                        |                   | M90 (N-H)              | AMP (N6)          |
|                        |                   | K139 (NZ-HZ3)          | AMP (O1P)         |
| <b>H141 (NE2-HE2)</b>  | <b>AMP (O2P)</b>  | <b>H141 (NE2-HE2)</b>  | <b>AMP (O2P)</b>  |
| <i>H141 (NE2-HE2)</i>  | <i>AMP (O3P)</i>  |                        |                   |
| <b>H141 (NE2-HE2)</b>  | <b>AMP (O1P)</b>  | <b>H141 (NE2-HE2)</b>  | <b>AMP (O1P)</b>  |
| <i>H141 (NE2-HE2)</i>  | <i>AMP(O5')</i>   |                        |                   |

H-bonds important to stabilize functional protein geometry of the binding and catalytic site<sup>29</sup> are typed in bold, while H-bonds lost in the p.R28L mutant CaM-kinase domain of CASK are typed in italics.

1 **Table S5 - Comparison of the clinical signs observed in patients with CASK mutations**

|                            | <i>Najm et al.</i>                                                                          |                                                |                 |                                                             |                                                                    | <i>Piluso et al.</i>                                        |                                                                       |                                                                                                                                                    |
|----------------------------|---------------------------------------------------------------------------------------------|------------------------------------------------|-----------------|-------------------------------------------------------------|--------------------------------------------------------------------|-------------------------------------------------------------|-----------------------------------------------------------------------|----------------------------------------------------------------------------------------------------------------------------------------------------|
|                            | Patient 1                                                                                   | Patient 2                                      | Patient 3       | Patient 4                                                   | Patient 5                                                          | Patient II.11                                               | Patient II.17                                                         | Patient III.26                                                                                                                                     |
| Ethnic origin              | German (C)                                                                                  | German (C)                                     | American (C)    | Turkish                                                     | American (C)                                                       | Italian (C)                                                 | Italian (C)                                                           | Italian (C)                                                                                                                                        |
| Sex                        | F                                                                                           | F                                              | F               | F                                                           | M                                                                  | M                                                           | M                                                                     | M                                                                                                                                                  |
| Living                     | yes                                                                                         | yes                                            | yes             | yes                                                         | Died at 2 weeks                                                    | yes                                                         | yes                                                                   | yes                                                                                                                                                |
| OFC (SD)                   | -2.7 (at birth)                                                                             | -2 (at birth)                                  | -2 (at birth)   | -2 (at birth)                                               | -1 (at birth)                                                      | N/D                                                         | N/D                                                                   | +1.3 (at 30 months)                                                                                                                                |
| Length (SD)                | +0.1 (at birth)                                                                             | -1 (at birth)                                  | -1.5 (at birth) | +0.6 (at birth)                                             | -1.1 (at birth)                                                    | N/D                                                         | N/D                                                                   | +0.2 (at 30 months)                                                                                                                                |
| Weight (SD)                | -0.5 (at birth)                                                                             | -1 (at birth)                                  | -0.9 (at birth) | -0.5 (at birth)                                             | +0.1 (at birth)                                                    | N/D                                                         | N/D                                                                   | -0.6 (at 30 months)                                                                                                                                |
| Developmental delay        | Severe                                                                                      | Severe                                         | Moderate        | Severe                                                      | N/A                                                                | Severe                                                      | Severe                                                                | Severe                                                                                                                                             |
| Congenital hypotonia       | -                                                                                           | +                                              | -               | +                                                           | +                                                                  | +(in infancy)                                               | +(in infancy)                                                         | +(in infancy)                                                                                                                                      |
| Speech                     | -                                                                                           | -                                              | -               | -                                                           | N/A                                                                | +                                                           | +                                                                     | +                                                                                                                                                  |
| Walking                    | -                                                                                           | -                                              | -               | -                                                           | N/A                                                                | +                                                           | +                                                                     | +                                                                                                                                                  |
| Feeding difficulties       | +                                                                                           | +                                              | +               | +                                                           | +                                                                  | -                                                           | -                                                                     | -                                                                                                                                                  |
| Seizures                   | +                                                                                           | +                                              | -               | -                                                           | -                                                                  | +                                                           | +                                                                     | +                                                                                                                                                  |
| EEG                        | Hypersynchronous, low amplitude activity                                                    | Spike and wave discharges with slow background | N/A             | Normal                                                      | N/A                                                                | Widely abnormal                                             | N/D                                                                   | Mildly abnormal                                                                                                                                    |
| Sensorineural hearing loss | +                                                                                           | +                                              | -               | -                                                           | N/A                                                                | +                                                           | N/A<br>N/D                                                            | +                                                                                                                                                  |
| MRI scan                   | Abnormal                                                                                    | Abnormal                                       | Abnormal        | Abnormal                                                    | Abnormal                                                           | Normal                                                      |                                                                       | Normal                                                                                                                                             |
| Facial anomalies           | Hypertelorism, broad nasal bridge and tip, smooth philtrum, large ears, small jaw, all mild | Broad nasal bridge, large ears, both mild      | Plagiocephaly   | Broad nasal bridge and tip, large ears, small jaw, all mild | Downslanting palpebral fissures, small jaw (father with small jaw) | Prominent forehead, hypertelorism, high broad long philtrum | Prominent forehead, frontal upsweep of the hair, long nasal philtrum. | Prominent forehead and frontal upsweep of the hair, hypertelorism, saddled root of the nose with a long philtrum and half-open mouth, micrognathia |
| Other abnormalities        | Episodic hyperpnea, mild regression of motor skills at 2 years                              | Scoliosis                                      | Spasticity      | -                                                           | Absent gag, no suck, hypoventilation, apnea                        | Severe constipation                                         | Severe constipation, bilateral epicanthus, cryptorchidism             | Severe constipation, scoliosis                                                                                                                     |

**American Journal of Human Genetics, Volume 84**

1

2 + = present; - = absent; C = Caucasian; N/A = not analyzed; N/D = not documented; SD = standard deviation.

3 Clinical data for patients 1-5 were previously reported by Najm et al.<sup>67</sup>. Clinical data for the affected males of the FGS family under study (II.11, II.17

4 and III.26) were also previously reported by Piluso et al.<sup>12</sup>.
